# Supplementary material for: A Comparative Study of the Influence of Nitrogen Content and Structural Characteristics of NiS/Nitrogen-Doped Carbon Nanocomposites on Capacitive Performances in Alkaline Medium
Source: MDPI journal article supplement (doi:10.3390/nano11071867), 2021-07-20
Supplement: s1 [file s1]

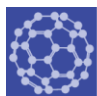

## Supplementary Materials

# A Comparative Study of the Influence of Nitrogen Content and Structural Characteristics of NiS/Nitrogen-Doped Carbon Nanocomposites on Capacitive Performances in Alkaline Medium

Mohamed M. Abdelaal <sup>1,2,†</sup>, Tzu-Cheng Hung <sup>1,†</sup>, Saad Gomaa Mohamed <sup>2</sup>, Chun-Chen Yang <sup>1,3,4</sup>, Huei-Ping Huang <sup>1</sup> and Tai-Feng Hung <sup>1,\*</sup>

<sup>1</sup> Battery Research Center of Green Energy, Ming Chi University of Technology, 84 Gungjuan Rd., Taishan District, New Taipei City 24301, Taiwan; mohamedbec@yahoo.com (M.M.A.); u07137023@mail2.mcut.edu.tw (T.-C.H.); ccyang@mail.mcut.edu.tw (C.-C.Y.); cindy118036@mail.mcut.edu.tw (H.-P.H.)

<sup>2</sup> Tabbin Institute for Metallurgical Studies (TIMS), Tabbin, Helwan 109, Cairo 11421, Egypt; sgmmohamed@gmail.com

<sup>3</sup> Department of Chemical Engineering, Ming Chi University of Technology, 84 Gungjuan Rd., Taishan District, New Taipei City 24301, Taiwan

<sup>4</sup> Department of Chemical and Materials Engineering, Chang Gung University, 259 Wenhua 1st Rd., Guishan District, Taoyuan 33302, Taiwan

\* Correspondence: taifeng@mail.mcut.edu.tw; Tel.: +886-2-2908-9899 (ext. 4957)

† These authors contributed to this work equally.

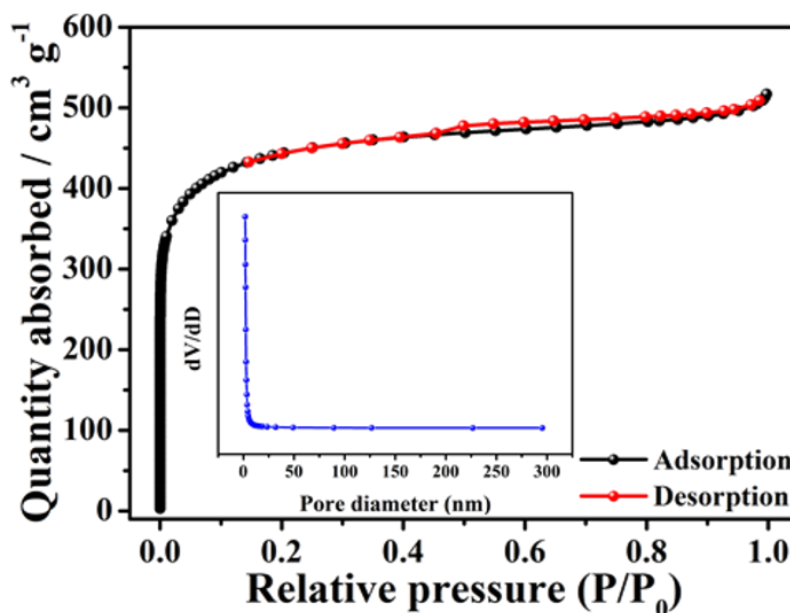

**Figure S1.** Nitrogen adsorption-desorption isotherm of A-PVP-NC collected by an accelerated surface area and porosimetry system at 77 K. Inset shows the pore size distribution curve calculated by BJH model.

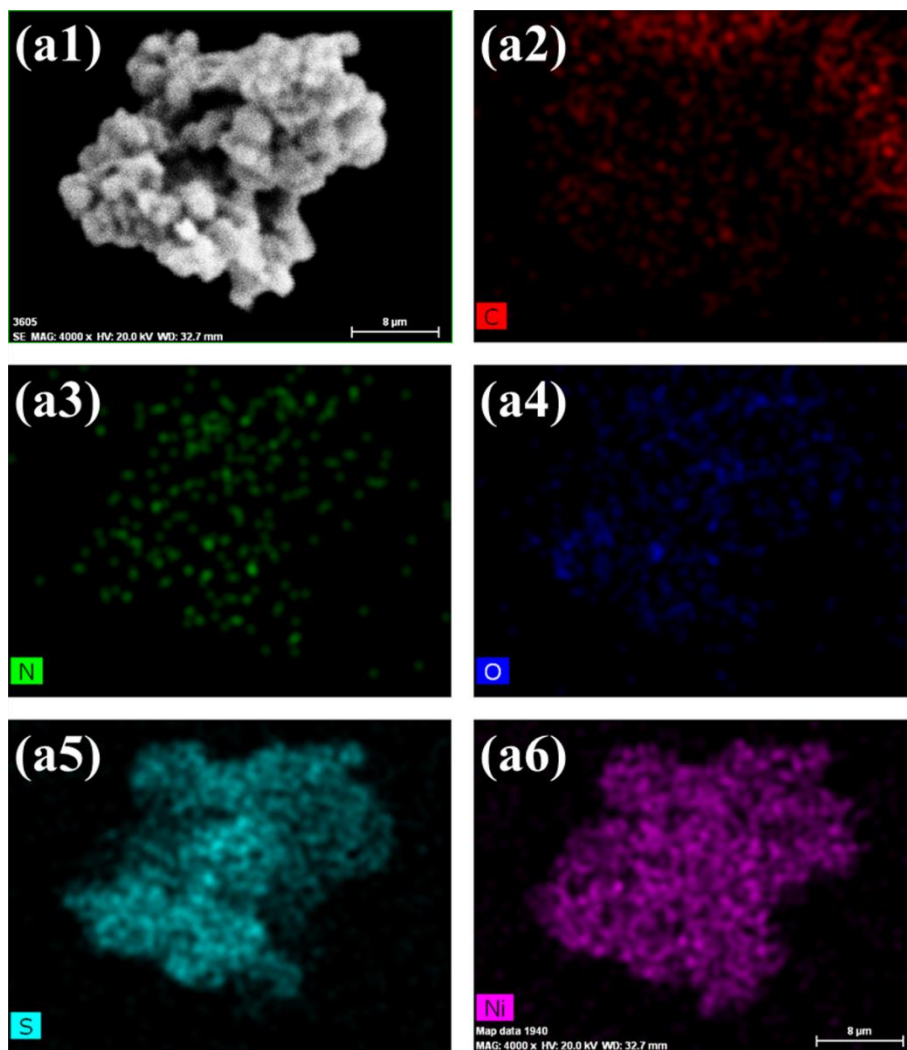

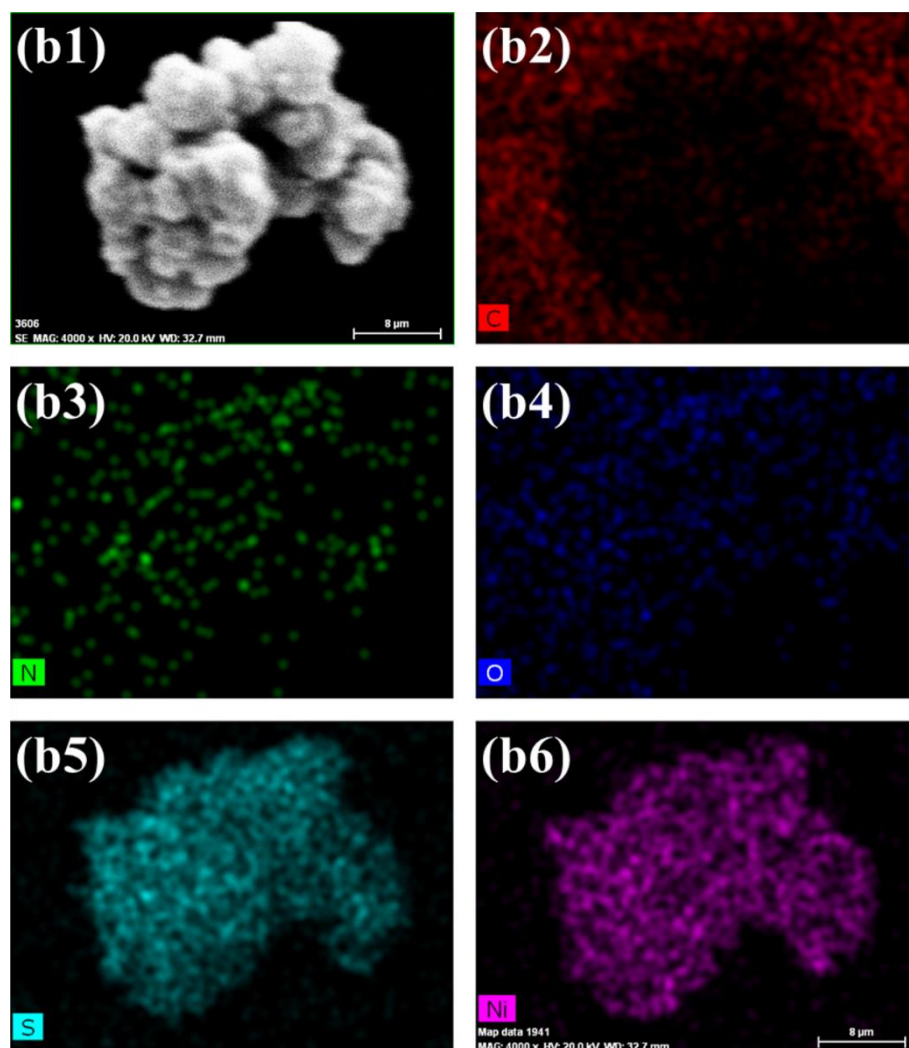

**Figure S2.** SEM-DEX mappings of (a) NiS-A-PVP-NC: (a1) SEM micrograph, (a2) carbon mapping, (a3) nitrogen mapping, (a4) oxygen mapping, (a5) sulfur mapping, (a6) nickel mapping and (b) NiS-PI-NC: (b1) SEM micrograph, (b2) carbon mapping, (b3) nitrogen mapping, (b4) oxygen mapping, (b5) sulfur mapping, (b6) nickel mapping. Scale bar: 8  $\mu$ m.

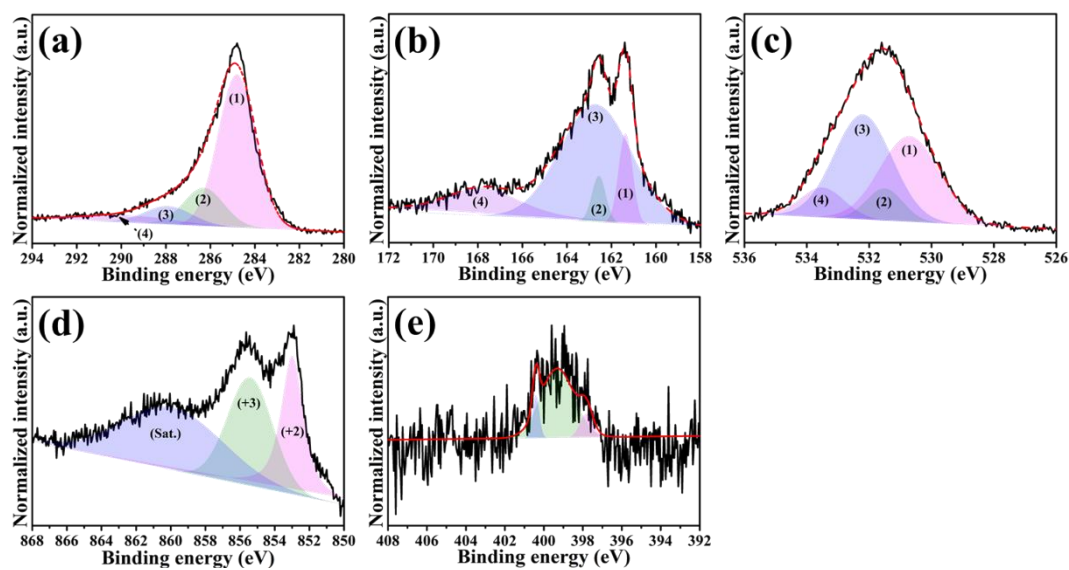

**Figure S3.** High-resolution XPS spectra of the NiS/A-PI-NC: (a) C 1s ((1) for C=C bond, (2) for C-O bond, (3) for C=O bond, and (4) for O=C-O bond), (b) S 2p ((1)-(3) assigned to  $S^{2-}$  within the NiS, and (4) from sulfate ions), (c) O 1s ((1) and (3) are associated with the  $Ni^{3+}OOH$  and  $Ni^{2+}SO_4$ , (2) for O=C-O bond, and (4) for C=O bond), (d) Ni 2p and (e) N 1s.

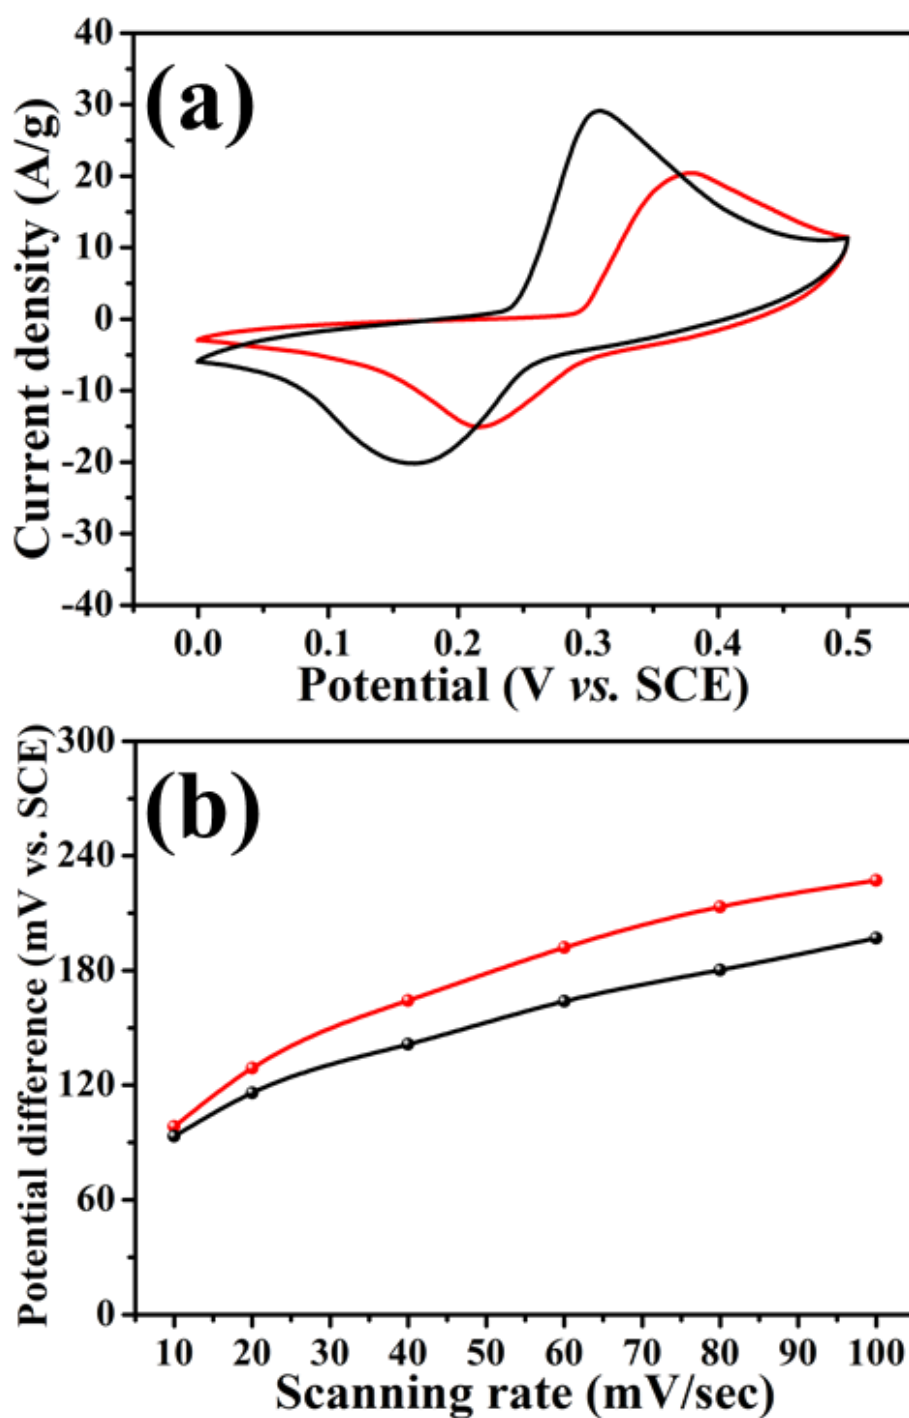

**Figure S4.** (a) Cyclic voltammograms of NiS/A-PVP-NC (-) and NiS/PI-NC (-), and (b) potential differences between anodic and cathodic peak positions of NiS/A-PVP-NC (•) and NiS/PI-NC (•).

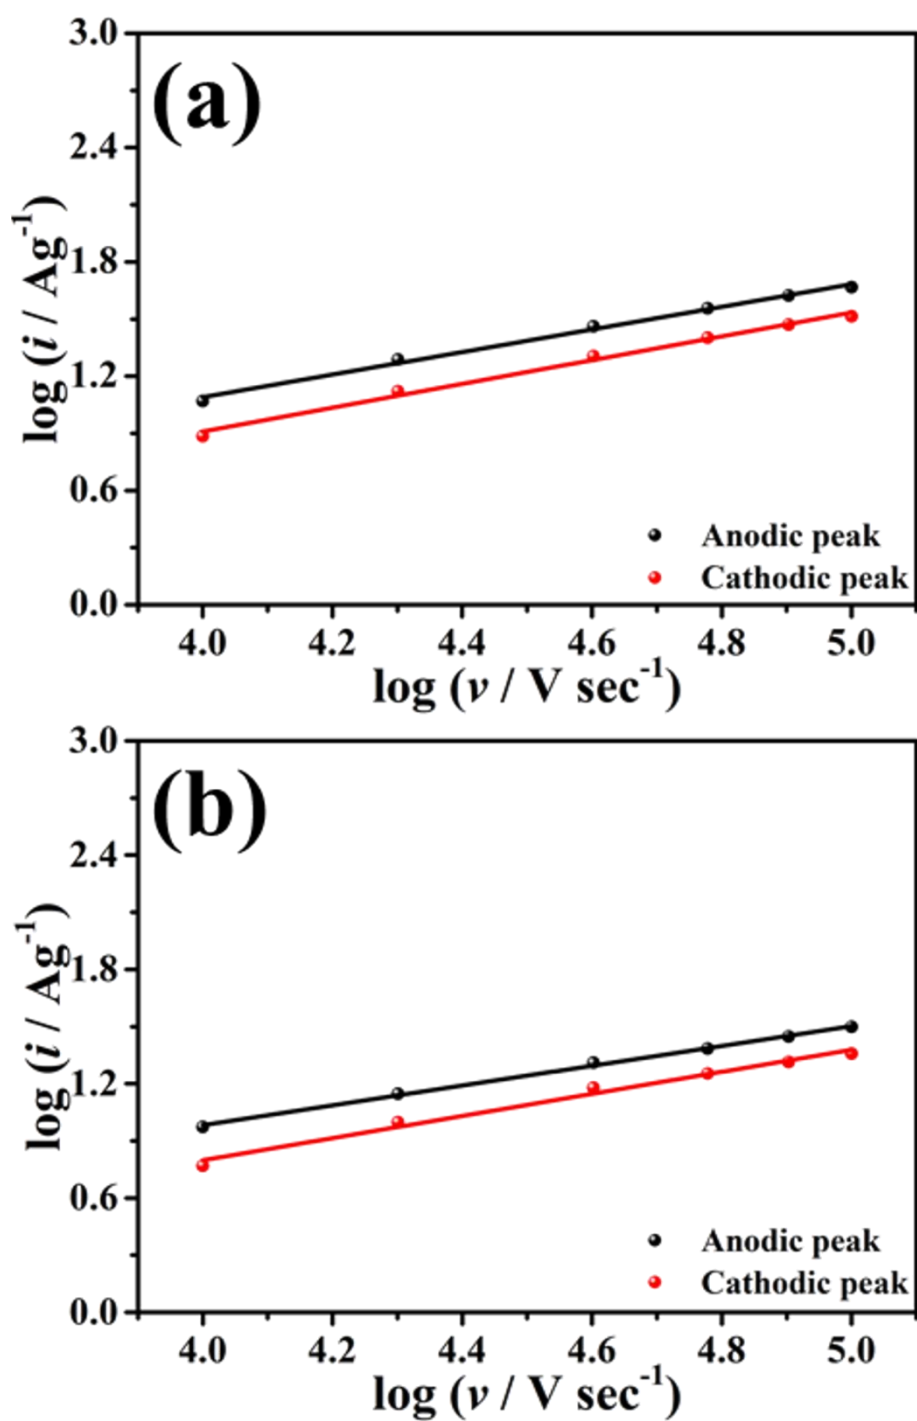

**Figure S5.** Anodic and cathodic current densities ( $\log(i)$ ) of (a) NiS/A-PVP-NC and (b) NiS/PI-NC plotted as a function of scan rate ( $\log(\nu)$ ).

**Table S1.** Textural properties of the A-PVP-NC.

| Sample   | SSA <sup>1</sup><br>(m <sup>2</sup> /g) | V <sub>t</sub> <sup>2</sup><br>(cm <sup>3</sup> /g) | V <sub>ultra</sub> <sup>3</sup><br>(cm <sup>3</sup> /g) | V <sub>micro</sub> <sup>4</sup><br>(cm <sup>3</sup> /g) | V <sub>meso</sub> <sup>5</sup><br>(cm <sup>3</sup> /g) |
|----------|-----------------------------------------|-----------------------------------------------------|---------------------------------------------------------|---------------------------------------------------------|--------------------------------------------------------|
| A-PVP-NC | 1628                                    | 0.79                                                | 0.25                                                    | 0.62                                                    | 0.17                                                   |

<sup>1</sup>SSA: Specific surface area calculated by the Brunauer-Emmett-Teller method.

<sup>2</sup>V<sub>t</sub>: total pore (single-point) volume obtained from the amount of adsorbed nitrogen at P/P<sub>0</sub> = 0.995.

<sup>3</sup>V<sub>ultra</sub>: volume of ultramicropores (pores < 0.7 nm).

<sup>4</sup>V<sub>micro</sub>: volume of micropores (pores < 2.0 nm).

<sup>5</sup>V<sub>meso</sub>: volume of mesopores (difference between V<sub>t</sub> and V<sub>micro</sub>).

**Table S2.** The potential differences ( $\Delta V$ ) between anodic and cathodic peak positions of NiS/A-PVP-NC and NiS/PI-NC.

| Scan rate<br>(mV/sec) | $\Delta V$ for NiS/A-PVP-NC<br>(mV <i>vs.</i> SCE) | $\Delta V$ for NiS/PI-NC<br>(mV <i>vs.</i> SCE) |
|-----------------------|----------------------------------------------------|-------------------------------------------------|
| 10                    | 93.2                                               | 98.3                                            |
| 20                    | 116.0                                              | 129.0                                           |
| 40                    | 141.5                                              | 164.3                                           |
| 60                    | 163.9                                              | 192.0                                           |
| 80                    | 180.3                                              | 213.4                                           |
| 100                   | 197.1                                              | 227.1                                           |

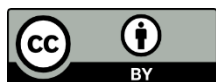

© 2021 by the authors. Licensee MDPI, Basel, Switzerland. This article is an open access article distributed under the terms and conditions of the Creative Commons Attribution (CC BY) license (<http://creativecommons.org/licenses/by/4.0/>).
